# Supplementary material
Source: PubMed Central journal article supplement (PMC7158776)
Supplement: mmc1.pdf [file mmc1.pdf]

# BSTI COVID-19 CXR Report Proforma

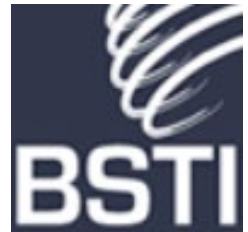

## Findings

### **Normal**

COVID-19 not excluded. Correlated with RT-PCR

### **Classic/Probable COVID-19**

Lower lobe and peripheral predominant multiple opacities that are bilateral (>> unilateral)

### **Indeterminate for COVID-19**

Does not fit Classic or Non-COVID-19 descriptors

### **Non-COVID-19**

Pneumothorax / Lobar pneumonia / Pleural effusion(s) / Pulmonary oedema

Other

## Quantifying disease

**Mild / Moderate / Severe**

## Other findings

Codes for subsequent Radiology Information System search:

**CVCX0** = Normal **CVCX1** = Classic **CVCX2** = Indeterminate **CVCX3** = Non-COVID-19

Please consider case upload to [https://bit.ly/BSTICovid19\\_Database](https://bit.ly/BSTICovid19_Database)
