# Supplementary material
Source: PubMed Central journal article supplement (PMC7158776)
Supplement: mmc2.pdf [file mmc2.pdf]

# Radiology decision tool for suspected COVID-19

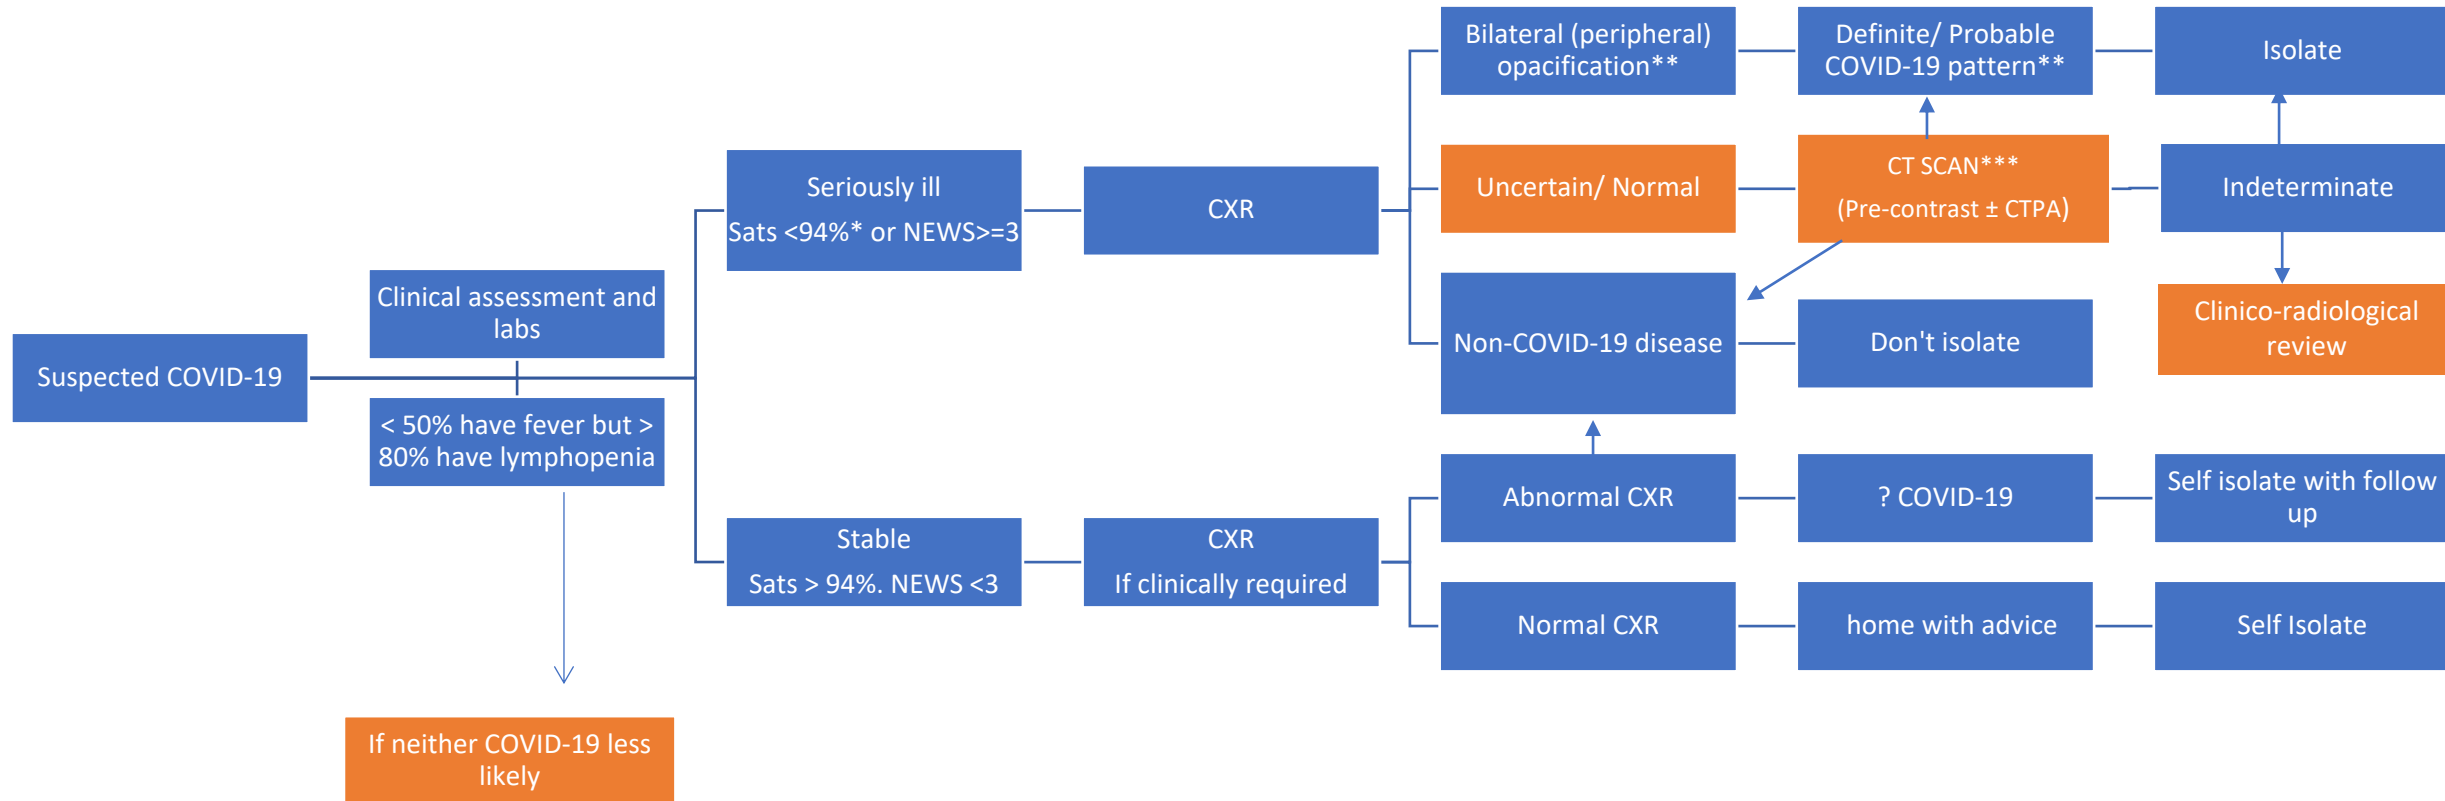

\*94% unless known COPD in which case <90%

\*\* Unsuspected/ unexpected cases may be incidentally discovered on CXR/ CT at this stage; should be reviewed in the context of clinical suspicion as to likelihood of COVID-19.

\*\*\*Classic and Indeterminate CTs should be scored either: 'mild' or 'moderate/severe'

Please upload all COVID 19 cases to BSTI database: <https://www.bsti.org.uk/training-and-education/covid-19-bsti-imaging-database/>
