# Supplementary material
Source: PubMed Central journal article supplement (PMC7158776)
Supplement: mmc3.pdf [file mmc3.pdf]

# BSTI: CT reporting proforma: COVID-19

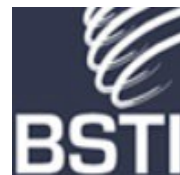

## Findings

### Normal

Correlate with PCT where appropriate (PCR can be normal in early infection).

### Classic/Probable COVID-19

Predominant pattern: Bilateral, basal, GGO/ Crazy-Paving / Peripheral consolidation / Reverse halo / Perilobular patterns

### Indeterminate for COVID-19

Non-peripheral GGO / Complex / Unilateral  
Other

### Non-COVID-19

Lobar pneumonia / cavitation / tree-in-bud  
/centrilobular nodules / lymphadenopathy / effusions  
/ other patterns

## Disease Distribution

- Bilateral
- Patchy
- Lobar
- Unilateral
- Diffuse
- Non-lobar

## Extent of abnormality

- $\leq 25\%$
- 26-50%
- 51-75%
- $>75\%$

Codes for RIS searches: CVCT0 = Normal CVCT1 = Classic/probable CVCT2 = Indeterminate

CVCT3 = Non-COVID-19 Please consider case upload to [https://bit.ly/BSTICovid19\\_Database](https://bit.ly/BSTICovid19_Database)
