# Supplementary material
Source: PubMed Central journal article supplement (PMC7158776)
Supplement: mmc4.pdf [file mmc4.pdf]

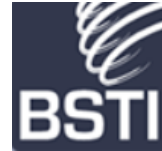

## ICU CXR

|                                      |                                                                                                                                                                                                                                                                |
|--------------------------------------|----------------------------------------------------------------------------------------------------------------------------------------------------------------------------------------------------------------------------------------------------------------|
| CXR finding                          | <b>Bilateral patchy air-space opacification</b><br>Bilateral symmetrical air space opacification<br>Bilateral peripheral air space opacification<br>Predominantly unilateral air space opacification Rt<br>Predominantly unilateral air space opacification Lt |
| Stable or progressive since previous | <b>Stable</b><br>Marginal improvement<br>Marginal progression<br>Significant progression                                                                                                                                                                       |
| Lines and Tubes                      | <b>Satisfactory</b><br>Misplaced ETT<br>Misplaced NGT<br>Misplaced IJV line<br>Other                                                                                                                                                                           |
| Other findings                       | <b>Nil</b><br>Pneumothorax Rt / Lt<br>Lobar collapse (free text box))<br>Pleural effusion Rt<br>Pleural effusion Lt                                                                                                                                            |
| Other                                | (free text box)                                                                                                                                                                                                                                                |

With support from Professor S. Desai, Royal Brompton Hospital, London
