# Supplementary material
Source: PubMed Central journal article supplement (PMC7158776)
Supplement: mmc5.pdf [file mmc5.pdf]

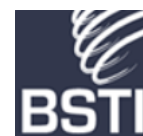

**CT Appearances**

|                                                    |                      |
|----------------------------------------------------|----------------------|
| Classical ARDS*                                    | Y/N                  |
| Patchy GGO/consolidation – no zonal predilection   | Y/N                  |
| Patchy GGO/consolidation – peripheral              | Y/N                  |
| Crazy-paving pattern                               | Y/N                  |
| Cavitation                                         | Y/N                  |
| Visual estimate of Extent of abnormal lung overall | <50% / 50-70% / >70% |
| Signs of fibrosis?                                 |                      |
| Varicose, non-tapering airways                     | Y/N                  |
| Parenchymal distortion                             | Y/N                  |

**Serial change in CT appearance (if applicable)**

|                         |     |
|-------------------------|-----|
| Stable                  | Y/N |
| Marginal improvement    | Y/N |
| Marginal progression    | Y/N |
| Significant progression | Y/N |
| Other                   |     |

**Lines and Tubes**

|                                                |     |
|------------------------------------------------|-----|
| All satisfactory                               | Y/N |
| Misplaced ETT (too high or low, in RMB or LMB) |     |
| Misplaced NGT                                  | Y/N |
| Misplaced IJV line                             | Y/N |
| Other                                          |     |

**Ancillary findings**

|                                               |                                    |
|-----------------------------------------------|------------------------------------|
| None                                          |                                    |
| Pneumothorax                                  | Rt / Lt                            |
| Lobar collapse                                | RUL, RML, RLL,<br>LUL/lingula, LLL |
| Pleural effusion Rt                           | Small / moderate / large           |
| Pleural effusion Lt                           | Small / moderate / large           |
| Moderate/severe emphysema                     | y/n                                |
| Moderate/severe coronary artery calcification | y/n                                |
| Moderate/severe aortic valve calcification    | y/n                                |

**Other**

\*Roughly symmetrical airspace opacification, increasing density from ventral to dorsal lung
