# Supplementary material
Source: PubMed Central journal article supplement (PMC7158776)

## THREE STEP TOOL

---

- **Does the patient have a new cough or fever?** Yes or No
- **Is there a lymphopenia or raised CRP?** Yes or No
- **Is the CXR consistent with COVID-19?** Yes or No

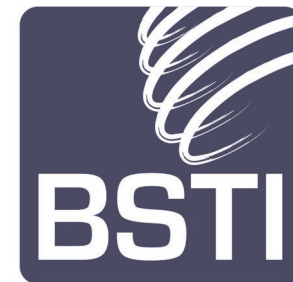

Supplement: mmc6.pdf [file mmc6.pdf]
