# Supplementary material
Source: PubMed Central journal article supplement (PMC7158776)

# Proposed Infection Control Management of Negative Initial COVID-19 Throat Swab PCRs

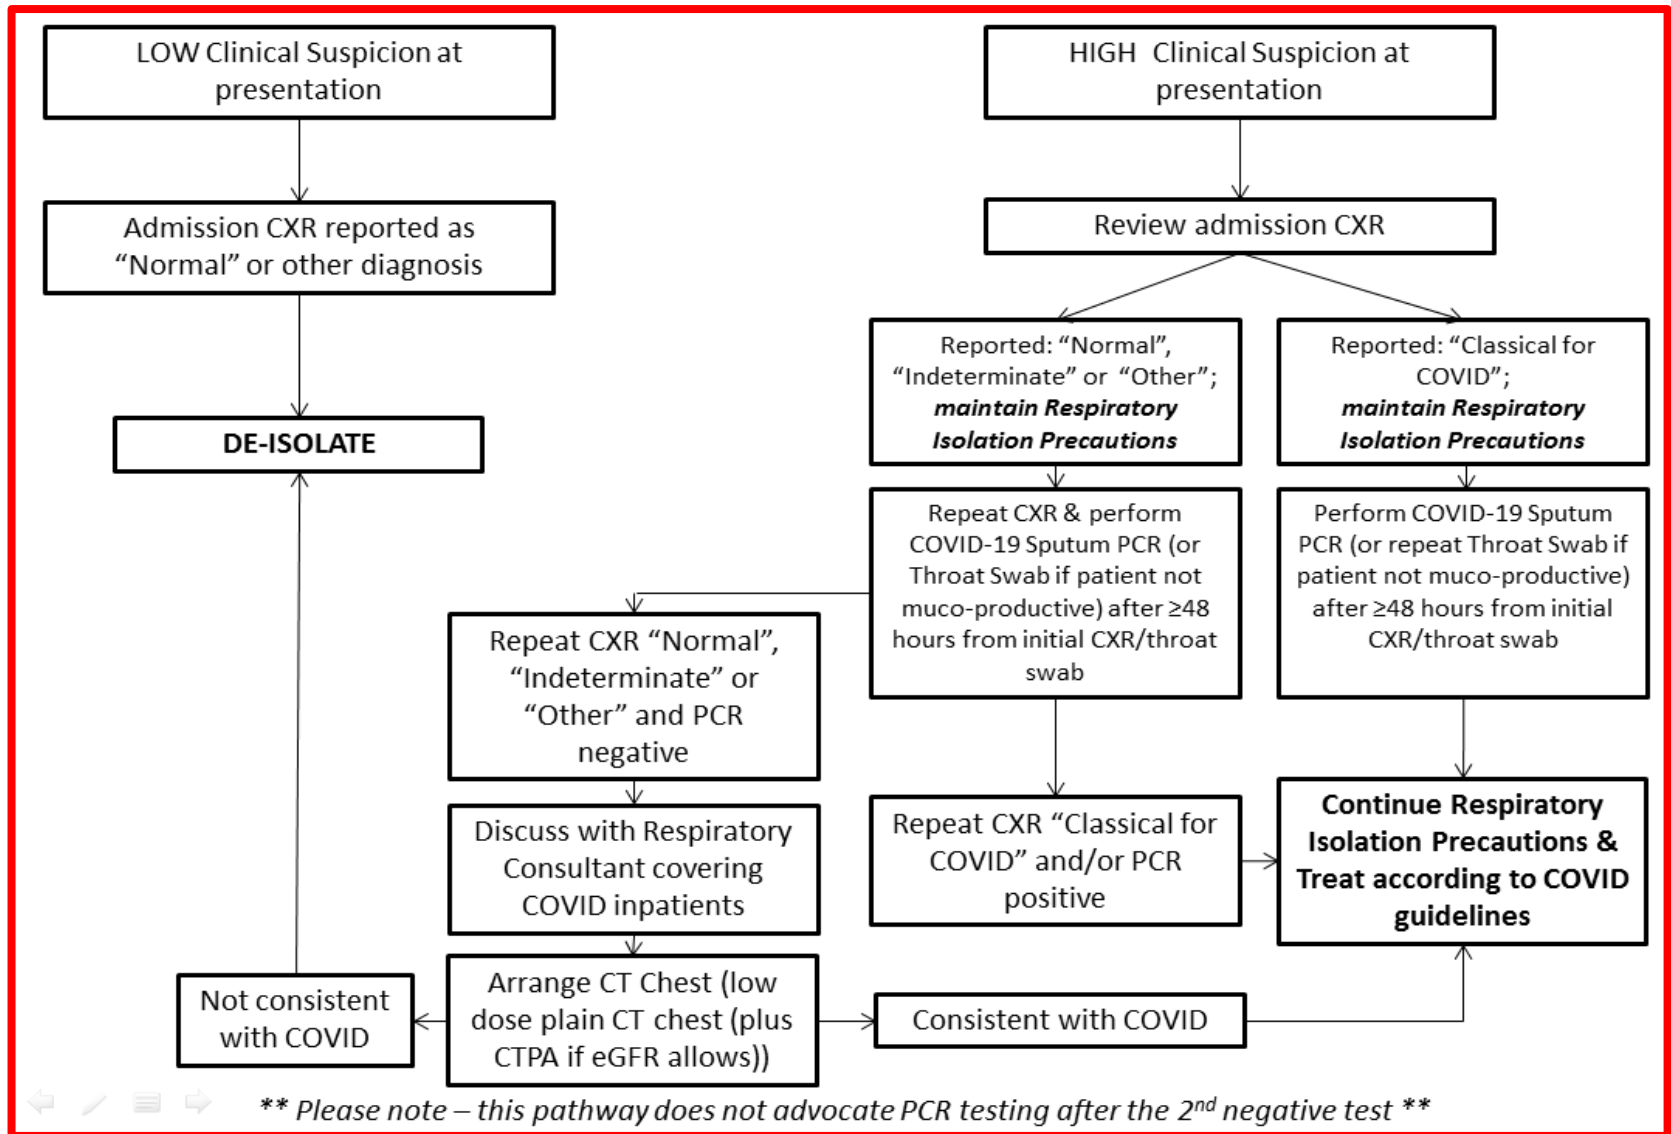

Supplement: mmc7.pdf [file mmc7.pdf]
